1 ***In planta* expression screens of candidate effector proteins from the wheat yellow rust**  
2 **fungus reveal processing bodies as a pathogen-targeted plant cell compartment**

3  
4  
5 Benjamin Petre<sup>1,2,3</sup>, Diane G.O. Saunders<sup>1,4,5</sup>, Jan Sklenar<sup>1</sup>, Cécile Lorrain<sup>1,2,3</sup>, Ksenia V.  
6 Krasileva<sup>1,4</sup>, Joe Win<sup>1</sup>, Sébastien Duplessis<sup>2,3\*</sup>, Sophien Kamoun<sup>1\*</sup>

7  
8 <sup>1</sup> The Sainsbury Laboratory, Norwich Research Park, NR4 7UH Norwich, United Kingdom

9 <sup>2</sup> INRA, UMR 1136 Interactions Arbres/Microorganismes, Centre INRA Nancy Lorraine,  
10 54280 Champenoux, France

11 <sup>3</sup> Université de Lorraine, UMR 1136 Interactions Arbres/Microorganismes, Faculté des  
12 Sciences et Technologies, 54506 Vandoeuvre-lès-Nancy, France

13 <sup>4</sup> The Genome Analysis Centre, Norwich Research Park, NR4 7UH Norwich, United Kingdom

14 <sup>5</sup> The John Innes Centre, Norwich Research Park, NR4 7UH Norwich, United Kingdom

15  
16 \* Sophien Kamoun, The Sainsbury Laboratory, Norwich Research Park, NR4 7UH Norwich,  
17 United Kingdom

18 Sophien.Kamoun@tsl.ac.uk

19  
20 **ABSTRACT**

21 Rust fungal pathogens of wheat (*Triticum* spp.) affect crop yields worldwide. The  
22 molecular mechanisms underlying the virulence of these pathogens remain elusive, due to  
23 the limited availability of suitable molecular genetic research tools. Notably, the inability to  
24 perform high-throughput analyses of candidate virulence proteins (also known as effectors)  
25 impairs progress. We previously established a pipeline for the fast-forward screens of rust  
26 fungal effectors in the model plant *Nicotiana benthamiana*. This pipeline involves selecting  
27 candidate effectors *in silico* and performing cell biology and protein-protein interaction assays  
28 *in planta* to gain insight into the putative functions of candidate effectors. In this study, we  
29 used this pipeline to identify and characterize sixteen candidate effectors from the wheat  
30 yellow rust fungal pathogen *Puccinia striiformis* f sp *tritici*. Nine candidate effectors targeted a  
31 specific plant subcellular compartment or protein complex, providing valuable information on  
32 their putative functions in plant cells. One candidate effector, PST02549, accumulated in  
33 processing bodies (P-bodies), protein complexes involved in mRNA decapping, degradation,  
34 and storage. PST02549 also associates with the P-body-resident ENHANCER OF mRNA  
35 DECAPPING PROTEIN 4 (EDC4) from *N. benthamiana* and wheat. Our work identifies P-  
36 bodies as a novel plant cell compartment targeted by pathogen effectors.

37  
38 **KEY WORDS**

39 *Agrobacterium tumefaciens*, coimmunoprecipitation, confocal microscopy, live-cell imaging,  
40 mass spectrometry, Pucciniales, *Triticum aestivum*, varicose, wheat stripe rust

41  
42  
43 **INTRODUCTION**

44 Plant pathogens colonize hosts by deploying virulence proteins known as effectors  
45 that manipulate plant cell structures and functions (Dodds and Rathjen, 2010; Win *et al.*,  
46 2012). Once delivered into host tissues, effectors reside in the extracellular space (apoplastic  
47 effectors) or translocate into the plant cells (cytoplasmic effectors). Unravelling how effectors  
48 function in the host is key to understanding parasitism and to developing resistant plants  
49 (Dangl *et al.*, 2013). Pathogen effectors are operationally plant proteins; they function in plant  
50 tissues, they associate with plant molecules, and their phenotypic expression in plants drives  
51 their evolution (Hogenhout *et al.*, 2009). The field of effector biology has rapidly advanced in  
52 recent years due in large part to the availability of host plants that are amenable to molecular  
53 genetics and in which effectors can be heterologously expressed and studied (for  
54 comprehensive reviews, see Martin and Kamoun, 2012). However, due to the limited  
55 availability of functional genetic resources for crop species, characterising the effectors of  
56 crop pathogens remains challenging (Petre *et al.*, 2014; Upadhyaya *et al.*, 2014). To study  
57 crop pathogen effectors, an alternative approach is the use a surrogate experimental plant  
58 system, such as *Nicotiana benthamiana* (Petre *et al.*, 2015a).

59 *Nicotiana benthamiana* (Solanaceae) is a well-established experimental system to  
60 study proteins *in planta* (Goodin *et al.*, 2008; Bombarely *et al.*, 2012). The agroinfiltration

61 method allows transient expression of proteins in leaf cells, and a wide range of assays is  
62 available for functional investigations. Thus, *N. benthamiana* is extensively used in effector  
63 biology (Pais *et al.*, 2014). We recently used this plant to set up an effectoromics pipeline  
64 aimed at determining the plant cell compartments and protein complexes targeted by  
65 candidate effectors of rust fungi (Petre *et al.*, 2015a; Petre *et al.*, 2015b). Such pipeline is a  
66 valuable tool for the rapid screening of candidate effectors.

67 Rust fungi (Pucciniales) are notorious for being destructive crop pathogens (Dean *et al.*  
68 *al.*, 2012). The species that infect wheat pose a constant threat to global food security  
69 (Beddow *et al.*, 2015). These fungal pathogens include the yellow rust fungus *Puccinia*  
70 *striiformis* f sp *tritici* (Chen *et al.*, 2014; Hubbard *et al.*, 2015). To date, effectors have not  
71 been functionally characterized for this species. However, genome and transcriptome  
72 analyses have predicted hundreds of candidate effectors, most of which are secreted proteins  
73 of unknown function (Cantu *et al.*, 2011; Garnica *et al.*, 2013; Zheng *et al.*, 2013). Cantu and  
74 colleagues recently combined genome and *in silico* analyses to prioritize candidate effectors  
75 for further functional analyses (Cantu *et al.*, 2013).

76 Processing bodies (P-bodies) are protein/RNA complexes that reside in the cytosol of  
77 eukaryotic cells. They control the decapping, degradation, and storage of mRNA molecules  
78 (Chan and Fritzlers, 2012). In plants, P-bodies and P-body-resident proteins have important  
79 roles in post-embryonic development (Xu *et al.*, 2006; Xu and Chua, 2009), salt stress  
80 tolerance (Steffens *et al.*, 2015), and immune responses (Maldonado-Bonilla *et al.*, 2014). In  
81 animals and yeast, limited evidence suggests that pathogenic bacteria and viruses target P-  
82 bodies (Eulalio *et al.*, 2011; Reineke and Lloyd, 2013). To date, no connection has been  
83 made between P-bodies and filamentous pathogens.

84 In this study, we investigated sixteen candidate effectors of the wheat yellow rust  
85 fungus *P. striiformis* f sp *tritici* using the *N. benthamiana* effectoromics pipeline we previously  
86 developed (Petre *et al.*, 2015a). We discovered that nine candidate effectors accumulate in  
87 distinct plant cell compartments and associate with specific protein complexes. Notably, the  
88 candidate effector PST02549 accumulates in P-bodies and associates with the wheat  
89 enhancer of mRNA decapping protein 4. Our findings suggest that P-bodies are a plant  
90 compartment targeted by pathogen effectors. We also conclude that *N. benthamiana* can be  
91 used as an experimental system to screen candidate effectors of pathogens of monocot  
92 plants, including obligate biotrophic pathogens of wheat.

## 93 RESULTS

### 94 Selection of 16 candidate effectors from *Puccinia striiformis* f sp *tritici*

95 The predicted effector complement of *P. striiformis* f sp *tritici* consists of hundreds of  
96 secreted proteins (Cantu *et al.*, 2013). To select candidate effectors for functional  
97 investigations, we leveraged our recently developed pipeline (Petre *et al.*, 2015a) to select  
98 eleven proteins, using transcript enrichment in purified haustoria as the principal criterion for  
99 selection. We also included five proteins previously flagged as promising candidates (Cantu  
100 *et al.*, 2013) to obtain a final list of sixteen candidate effectors (Table 1, Table S1). These  
101 sixteen candidates are Pucciniales-specific, and only seven show some sequence similarity to  
102 proteins of the wheat stem rust fungus *Puccinia graminis* f sp *tritici* (Table 1). This finding  
103 suggests that most of these candidate effectors recently emerged in the Pucciniaceae family.

### 104 Candidate effector-fluorescent protein fusions accumulate in *N. benthamiana* leaf cells

105 To test whether the mature form (i.e. without the signal peptide) of the candidate  
106 effectors could be expressed in dicot cells, we generated candidate effector-green fluorescent  
107 protein (GFP) fusions and expressed them in *N. benthamiana* by agroinfiltration. Live-cell  
108 imaging and immunoblotting assays revealed that the sixteen fusion proteins accumulate in  
109 leaf cells at detectable levels, with no obvious sign of aggregation or degradation (Figure 1;  
110 Figure S1). Some fusions showed a band signal at a lower molecular weight, in addition to the  
111 band signal at the theoretical size (PST18220, PST03196, and PST12160), or a band signal  
112 at a higher molecular weight than expected (PST02549 and PST05023), suggesting post-  
113 translational modifications (Figure S1). As the proteins effectively accumulated in leaf cells,  
114 we inferred that transient assays in *N. benthamiana* are suitable for further *in planta* analyses.

### 115 Seven candidate effectors accumulate in specific plant cell compartments

116 To identify the plant cell compartments in which the candidate effectors accumulate,  
117 we performed live-cell imaging of cells expressing effector-GFP fusions. Seven out of the  
118  
119  
120

121 sixteen fusion proteins displayed an informative distribution in leaf cells (Figure 1). The  
122 fluorescence signal from PST02549-GFP and PST03196-GFP accumulated in small cytosolic  
123 bodies and chloroplasts, respectively, as well as in the nucleus and the cytosol (Figure 1A-B).  
124 The fluorescence signal from PST18220-GFP labelled both chloroplasts and nuclei,  
125 suggesting a dual targeting to the two organelles (Figure 1C). The fluorescence signal from  
126 PST18447-GFP, PST11721-GFP, and PST15391-GFP specifically accumulated in nuclei,  
127 and PST11721-GFP also labelled nuclear foci in some rare cases (Figure 1D-F, Figure S2).  
128 Finally, the fluorescence signal from PST05023-GFP labelled endomembrane compartments  
129 (Figure 1G). The fluorescence signal from the remaining nine fusion proteins had a non-  
130 informative distribution in the nucleus and the cytosol, similar to the distribution of a free GFP  
131 control (Figure 1H-P).

132 To explain the specific accumulation patterns observed, we examined the candidate  
133 effectors for subcellular targeting sequences. We focused on PST15391 and PST18447,  
134 because they showed specific, robust accumulation in nuclei (Figure 1D and 1F; Figure 2).  
135 Previous analysis failed to identify a nuclear-localisation signal (NLS) for PST15391 and  
136 PST18447 (Cantu *et al.*, 2013). However, we noted that both carry NLS-like stretches of  
137 amino acids enriched in positively charged residues at the C-terminus and N-terminus of their  
138 mature forms, respectively (Figure 2A). Truncations lacking the NLS-like sequences  
139 accumulated mainly in the cytosol and only showed background accumulation in the nucleus,  
140 demonstrating that these regions are necessary for specific nuclear accumulation (Figure 2B).  
141 This set of experiments suggests that *P. striiformis* f sp *tritici* effectors use targeting  
142 sequences to traffic within plant cells.

#### 143 **Six candidate effectors specifically and reliably associate with plant proteins**

144 To gain further insight into the putative functions of the candidate effectors, we next  
145 aimed to identify the plant proteins they interact with *in planta* using anti-GFP  
146 coimmunoprecipitation/liquid chromatography-tandem mass spectrometry (coIP/MS) (Petre *et*  
147 *al.*, 2015a). Using this approach, we identified 439 *N. benthamiana* proteins as potential  
148 interactors of the 16 candidate effectors (Table S2, Figure S3). A candidate effector  
149 associated with an average of 98 proteins, ranging from 20 to 236 (Figure 3A). Conversely, a  
150 plant protein associated with an average of 3.5 candidate effectors, ranging from 1 to 16  
151 (Figure 3B). Given the high complexity of the dataset, we used a scoring method we  
152 previously developed to discriminate reliable and specific interactors (high score) from  
153 redundant and non-specific ones (low score) (Petre *et al.*, 2015a). Scores ranged from 0.003  
154 to 108, with an average value of 0.91 (Figure 3C). Eighteen proteins had a score of  $\geq 3$ , and  
155 all specifically coimmunoprecipitated with a single candidate effector (Figure 3C, Figure 4).  
156 For instance, the protein with the highest score (108) was an enhancer of mRNA decapping  
157 protein 4 (NbEDC4) that specifically and robustly immunoprecipitated with PST02549 (Table  
158 S2).  
159

#### 160 **PST02549 associates with the wheat enhancer of mRNA decapping protein 4 (TaEDC4) 161 in P-bodies**

162 Our coIP/MS assays showed that PST02549 specifically associated with NbEDC4.  
163 To evaluate the biological significance of this association, we first identified and cloned the  
164 protein with the highest amino acid sequence similarity to NbEDC4 in bread wheat (*Triticum*  
165 *aestivum*), and named it TaEDC4. NbEDC4, TaEDC4, and *Arabidopsis thaliana* EDC4  
166 (AtEDC4, also known as VARICOSE or VCS) are of a similar length (1203 to 1349 amino  
167 acids) and exhibit a pairwise amino acid sequence identity of between 42 and 46% (Figure  
168 5A). The amino acid sequence identity between these proteins reaches 75% in the N-terminal  
169 WD40 domain (Figure 5B). Next, we expressed a TaEDC4-mCherry fusion in *N. benthamiana*  
170 leaf cells. Confocal microscopy revealed that TaEDC4-mCherry accumulated in cytosolic foci  
171 in addition to the cytosol. Since EDC4 is a component of P-bodies, we hypothesized that the  
172 foci we observed were P-bodies. To test this hypothesis, we co-expressed TaEDC4-mCherry  
173 with YFP-VCS, a marker of P-bodies (Xu *et al.*, 2006). Confocal microscopy revealed  
174 perfectly overlapping signals in cytosolic foci, confirming that TaEDC4 accumulates in P-  
175 bodies in *N. benthamiana* leaf cells (Figure 5C).  
176

177 To determine whether PST02549 and TaEDC4 associate *in planta*, we co-expressed  
178 PST02549-GFP and TaEDC4-mCherry fusion proteins in *N. benthamiana* leaf cells and  
179 performed anti-GFP coimmunoprecipitation followed by immunoblotting or sodium dodecyl  
180

181 sulphate polyacrylamide gel electrophoresis/Coomassie Brilliant Blue (SDS-PAGE/CBB)  
182 staining. Both the anti-mCherry immunoblot and the SDS-PAGE/CBB assays revealed a  
183 specific band signal matching the predicted size of TaEDC4-mCherry in protein complexes  
184 immunoprecipitated with PST02549-GFP, indicating a strong and robust association between  
185 the two proteins (Figure 6). As negative controls, we used three GFP and three mCherry  
186 fusion proteins available in the lab (see Materials and Methods for details); none of these  
187 control proteins associated with either PST02549 or TaEDC4. Confocal microscopy revealed  
188 that the fluorescence signals from PST02549-GFP and TaEDC4-mCherry perfectly  
189 overlapped in cytosolic foci, indicating co-accumulation in P-bodies (Figure 7A). From this set  
190 of experiments, we conclude that PST02539 and TaEDC4 specifically and robustly associate  
191 in P-bodies in *N. benthamiana* leaf cells.

### 192 193 **Co-expression of PST02549 and TaEDC4 increases the size of P-bodies**

194 During confocal microscopy assays of *N. benthamiana* leaf cells co-expressing  
195 PST02549-GFP and TaEDC4-mCherry, we noted that the P-bodies appeared larger than  
196 usual (Figure 7A). To quantify this phenomenon, we measured the diameter of P-bodies from  
197 confocal microscopy images. When PST02549-GFP was co-expressed with TaEDC4-  
198 mCherry or an untagged version of TaEDC4, the average diameters of the P-bodies were  $4.5$   
199  $\pm 3.5$   $\mu\text{m}$  and  $4.9 \pm 2.2$   $\mu\text{m}$ , respectively (Figure 7B, Table S4). By contrast, when PST02549-  
200 GFP and TaEDC4-mCherry were expressed independently and/or with other control proteins,  
201 the average diameter of a P-body was  $1.3 \pm 0.6$   $\mu\text{m}$ . CoIP/MS assays confirmed the presence  
202 of the untagged TaEDC4, as well as the presence of the endogenous NbEDC4, in complex  
203 with PST02549 (Table S5). None of the negative controls we tested co-localised with  
204 PST02549-GFP or TaEDC4-mCherry or triggered the formation of large P-bodies (Figure 7B  
205 and C, Table S4). We conclude that co-expression of PST02549 and TaEDC4 specifically  
206 increases the size of P-bodies.

### 207 208 **DISCUSSION**

209 In this study, we found that PST02549 accumulates in plant cell P-bodies and  
210 associates with a P-body-derived protein. This observation suggests that an effector that  
211 targets plant P-bodies has evolved in *P. striiformis* f sp *tritici*. To our knowledge, a connection  
212 between filamentous plant pathogens and P-bodies has not previously been established.

213 How would a pathogen benefit from manipulating host P-bodies? Some plant  
214 pathogen effectors target components of the host RNA silencing machinery (Weiberg *et al.*,  
215 2013; Qiao *et al.*, 2015, Spanu 2015). In *A. thaliana*, two recent reports have connected P-  
216 bodies, or P-body-resident proteins, with plant immune responses (Maldonado-Bonilla *et al.*,  
217 2014; Roux *et al.*, 2015). Therefore, pathogen effectors may target P-bodies to manipulate  
218 RNA metabolism and/or suppress immune responses. Interestingly, pathogenic bacteria and  
219 viruses that infect mammals are known to alter the structure and function of host P-bodies  
220 (Ariumi *et al.*, 2011; Eulalio *et al.*, 2011; Perez-Vilaro *et al.*, 2012). Therefore, diverse  
221 parasites of eukaryotes have evolved to target host P-bodies. Further mechanistic  
222 investigations of the pathogen effector/P-body interplay should reveal the biological  
223 significance of this phenomenon.

224 We observed an increase in P-body size upon co-expression of PST02549 and  
225 TaEDC4. The depletion or overexpression of P-body components is known to modify P-body  
226 integrity, which can lead to an increase in size (Eulalio *et al.*, 2007). It is therefore possible  
227 that the increase in P-body size observed in our study is due to over-accumulation of P-body-  
228 resident proteins such as PST02549 or TaEDC4. However, we observed this phenomenon  
229 only when the two proteins co-accumulated, indicating that both are required to increase P-  
230 body size. The biological significance of the association between PST02549 and TaEDC4 as  
231 well as the increase in P-body size remain to be further investigated in wheat.

232 The pipeline we used in this study allowed us to retrieve informative data for more  
233 than 50% of the candidate effectors we tested. We recently obtained informative data for 40%  
234 of a set of candidate effectors from another rust species (Petre *et al.*, 2015a). Thus, *N.*  
235 *benthamiana* is a valuable heterologous system for fast-forward effectoromic analysis of plant  
236 pathogens, regardless of their host plant.

237 We identified plant interactors of candidate effectors, some of which may represent  
238 *bone fide* effector targets. Growing evidence suggests that during evolution domains from  
239 effector targets have been incorporated into immune receptors such as nucleotide binding-  
240 leucine rich repeat (NB-LRR, also referred to as NLR) proteins to become 'sensor domains'

241 that mediate recognition of specific effectors (Cesari *et al.*, 2014; Wu *et al.*, 2015; Sarris *et al.*,  
242 2015). A recent genome-wide analysis predicted many NLR gene models in which protein  
243 domains that differ from typical NLR domains have been incorporated (Sarris *et al.*, in review).  
244 Interestingly, six of the eighteen top scoring effector interactors identified in our study carry a  
245 protein domain that is predicted to be integrated into a plant NLR, including the WD40 protein  
246 domain of EDC4 (Table S2). Therefore, our predicted host targets can be a valuable source  
247 of new 'baits' for engineering NLR genes with sensor domains.

## 248 249 **MATERIALS AND METHODS**

### 250 251 ***In silico* analyses**

252 Predicted protein sequences were retrieved from the following sources: *P. striiformis* f  
253 *sp tritici* (<http://yellowrust.com/>; Cantu *et al.*, 2013), *N. benthamiana* (<http://solgenomics.net/>;  
254 Bombarely *et al.*, 2012), and *T. aestivum* (<http://www.plantgdb.org/TaGDB/>). Protein  
255 sequence analysis was performed with ClustalX and Jalview programmes. Homology  
256 searches were performed with the BLAST+ programme. The most stringent criterion for  
257 selection of the candidate effectors was transcript enrichment in purified haustoria compared  
258 to infected tissues (Cantu *et al.*, 2013). The set of candidate effectors selected via the pipeline  
259 was manually analysed to remove redundant family members. PST05258 and PST15391  
260 from Tribe 54, as well as PST18220 and PST18221 from Tribe 238, were both retained due to  
261 high levels of polymorphism (Cantu *et al.*, 2013).

### 262 263 **Cloning procedures and plasmids**

264 The open reading frame (ORF) encoding the mature form (i.e. without the signal  
265 peptide) of *P. striiformis* f *sp tritici* small-secreted proteins or the full-length of *T. aestivum*  
266 EDC4 (Traes\_6DL\_3FBA5B70E.1) were amplified by polymerase chain reaction (PCR) using  
267 cDNA isolated from wheat leaves 14 days after inoculation with a virulent isolate of *P.*  
268 *striiformis* f *sp tritici* (isolate PST-08/21; Cantu *et al.*, 2013), or were obtained through gene  
269 synthesis (Genewiz, London, UK), with codon optimization for plant expression and removal  
270 of internal BbsI and BsaI restriction sites. Primers and synthetic genes were designed to be  
271 compatible with the suite of Golden Gate vectors, as previously described (Petre *et al.*,  
272 2015a; Table S1). Truncated versions of PST15391 and PST18447 were obtained by PCR  
273 cloning. All PCR-generated DNA fragments were verified by sequencing after cloning into  
274 level 0 Golden Gate vectors. Plasmids were multiplied and conserved in *Escherichia coli*  
275 (Subcloning Efficiency DH5 $\alpha$  Competent Cells; Invitrogen, Carlsbad, California, USA) as  
276 previously described (Petre *et al.*, 2015a). The fusion proteins built with candidate effectors  
277 from the poplar rust fungus *Melampsora larici-populina* (MLP124111, MLP123218,  
278 MLP123438 and MLP124202CT) were obtained in previous studies (Petre *et al.*, 2015a, Petre  
279 *et al.*, 2015b, Petre *et al.*, unpublished) and were used as negative controls in colP  
280 and confocal microscopy assays.

### 281 282 283 **Transient protein expression in *N. benthamiana* leaf cells**

284 *Agrobacterium tumefaciens* (electrocompetent strain GV3101) was used to deliver T-  
285 DNA constructs in leaf cells of three- to four-week-old *N. benthamiana* plants, following the  
286 agroinfiltration method previously described (Petre *et al.*, 2015a). The leaves were collected  
287 two days after infiltration for further protein isolation or microscopy.

### 288 289 **Live-cell imaging by laser-scanning confocal microscopy**

290 Confocal microscopy was performed as previously reported (Petre *et al.*, 2015a) with  
291 a Leica DM6000B/TCS SP5 laser-scanning confocal microscope (Leica Microsystems, Bucks,  
292 UK), using 10x (air) and 63x (water immersion) objectives. Each construct gave a similar  
293 localisation pattern in at least three independent observations. Image analysis was performed  
294 using the Fiji plugin of Image J 2.0.0 (<http://fiji.sc/Fiji>). To quantify the diameter of P-bodies,  
295 the 'measure' tool of Fiji was used to measure manually-drawn lines matching the apparent  
296 diameter of P-bodies in all the single optical section confocal images acquired in the course of  
297 this project. Categorical scatterplots were generated with R, using the ggplot2 package and  
298 an in-house developed script (Text S1).

299  
300

## 301 **Protein isolation and immunoblot analyses**

302 Frozen leaves were ground to a powder using a mortar and pestle. Total proteins  
303 were extracted as previously described (Petre *et al.*, 2015a). Ten microliters of isolated  
304 protein was separated on a 15% SDS-PAGE gel, and the protein content was estimated by  
305 Coomassie Brilliant Blue (CBB) staining. Immunoblot analysis was performed as previously  
306 described (Petre *et al.*, 2015a), using GFP (B2):sc-9996 HRP-conjugated antibody (Santa-  
307 Cruz Biotechnology), rat anti-RFP 5F8 antibody (Chromotek, Munich, Germany) and a HRP-  
308 conjugated anti-rat antibody.

## 309 **Coimmunoprecipitation and LC-MS/MS analyses**

310 Coimmunoprecipitation procedures were performed as reported by Win and  
311 colleagues (2011), with the adaptation described in Petre *et al.*, 2015a, using GFP\_Trp\_A  
312 beads (Chromotek, Munich, Germany). GFP and mCherry fusion proteins (Petre *et al.*,  
313 2015a, Petre *et al.*, 2015b, Petre *et al.*, unpublished) selected based on their ability to  
314 generate cytosolic aggregates, their similarity to tested proteins, or their ability to associate  
315 with a high number of proteins (i.e. their 'stickyness') in coIP assays were used as negative  
316 controls. Sample preparation, liquid chromatography / tandem mass spectrometry (LC-  
317 MS/MS) and data analyses were performed as described in Petre *et al.*, 2015a, using a hybrid  
318 mass spectrometer LTQ-Orbitrap XL (ThermoFisher Scientific, Carlsbad, California, USA) and  
319 a nanoflow-UHPLC system (NanoAcquity Waters Corp., Burnsville, Minnesota, USA). LC-  
320 MS/MS data were processed and scored as previously described (Petre *et al.*, 2015a; Table  
321 S2).  
322

## 323 **ACKNOWLEDGMENTS**

324 We thank the Norwich Rust Group for discussions, Dr. Vanessa Segovia (Norwich,  
325 UK) for providing material, and support teams at The Sainsbury Laboratory and The John  
326 Innes Centre. BP was supported by an INRA Contrat Jeune Scientifique (CJS), by the  
327 European Union, in the framework of the Marie-Curie FP7 COFUND People Programme,  
328 through the award of an AgreeSkills' fellowship (under grant agreement n° 267196). DGOS  
329 was supported by a Leverhulme early career fellowship and a fellowship in computational  
330 biology at TGAC, in partnership with the John Innes Centre, and strategically supported by  
331 BBSRC. CL is supported by an INRA CJS. BP, CL, and SD are supported by the French  
332 National Research Agency through the Labex ARBRE (ANR-12-LABXARBRE-01) and the  
333 Young Scientist Grant POPRUST (ANR-2010-JCJC-1709-01). KVK is strategically supported  
334 by the BBSRC and the Gatsby Charitable Foundation. Research at The Sainsbury Laboratory  
335 is supported by the Gatsby Charitable Foundation and the BBSRC.  
336

## 337 **REFERENCES**

- 338 Ariumi Y, Kuroki M, Kushima Y, Osugi K, Hijikata M, Maki M, Ikeda M, Kato N. 2011.  
339 Hepatitis C virus hijacks P-body and stress granule components around lipid droplets. *J Virol*  
340 **85**:6882-92
- 341 Beddow JM, Pardey PG, Chai Y, Hurley TM, Kriticos DJ, Braun H-J, Park RF, Cuddy  
342 WS, Yonow T. 2015. Research investment implications of shifts in the global geography of  
343 wheat stripe rust. *Nat Plants* 1:15132
- 344 Bombarely A, Rosli HG, Vrebalov J, Moffett P, Mueller LA, Martin GB. 2012. A draft  
345 genome sequence of *Nicotiana benthamiana* to enhance molecular plant-microbe biology  
346 research. *Mol Plant Microbe Interact* **25**:1523-30
- 347 Cantu D, Segovia V, MacLean D, Bayles R, Chen X, Kamoun S, Dubcovsky J, Saunders  
348 DG, Uauy C. 2013. Genome analyses of the wheat yellow (stripe) rust pathogen *Puccinia*  
349 *striiformis* f. sp. *tritici* reveal polymorphic and haustorial expressed secreted proteins as  
350 candidate effectors. *BMC Genomics* **14**:270
- 351 Cantu D, Govindarajulu M, Kozik A, Wang M, Chen X, Kojima KK, Jurka J, Michelmore  
352 RW, Dubcovsky J. 2011. Next generation sequencing provides rapid access to the genome  
353 of *Puccinia striiformis* f. sp. *tritici*, the causal agent of wheat stripe rust. *PLoS One* **6**:e24230
- 354 Cesari S, Bernoux M, Moncuquet P, Kroj T, Dodds PN. 2014. A novel conserved  
355 mechanism for plant NLR protein pairs: the "integrated decoy" hypothesis. *Front Plant Sci*  
356 **5**:606
- 357 Chen W, Wellings C, Chen X, Kang Z, Liu T. 2014. Wheat stripe (yellow) rust caused by  
358 *Puccinia striiformis* f. sp. *tritici*. *Mol Plant Pathol* **15**:433-46  
359

- 360 **Dangl JL, Horvath DM, Staskawicz BJ.** 2013. Pivoting the plant immune system from  
361 dissection to deployment. *Science* **341**:746-51
- 362 **Dean R, Van Kan JA, Pretorius ZA, Hammond-Kosack KE, Di Pietro A, Spanu PD, Rudd**  
363 **JJ, Dickman M, Kahmann R, Ellis J, Foster GD.** 2012. The Top 10 fungal pathogens in  
364 molecular plant pathology. *Mol Plant Pathol* **13**:414-30
- 365 **Dodds PN, Rathjen JP.** 2010. Plant immunity: towards an integrated view of plant-pathogen  
366 interactions. *Nat Rev Genet* **11**:539-48
- 367 **Eulalio A, Fröhlich KS, Mano M, Giacca M, Vogel J.** 2011. A candidate approach  
368 implicates the secreted Salmonella effector protein SpvB in P-body disassembly. *PLoS One*  
369 **6**:e17296.
- 370 **Eulalio A, Behm-Ansmant I, Izaurralde E.** 2007. P bodies: at the crossroads of post-  
371 transcriptional pathways. *Nat Rev Mol Cell Biol* **8**:9-22
- 372 **Garnica DP, Upadhyaya NM, Dodds PN, Rathjen JP.** 2013. Strategies for Wheat Stripe  
373 Rust Pathogenicity Identified by Transcriptome Sequencing. *PLoS One* **8**:e67150.
- 374 **Goodin MM, Zaitlin D, Naidu RA, Lommel SA.** 2008. *Nicotiana benthamiana*: its history and  
375 future as a model for plant-pathogen interactions. *Mol Plant Microbe Interact* **21**:1015-26
- 376 **Hubbard A, Lewis CM, Yoshida K, Ramirez-Gonzalez RH, de Vallavieille-Pope C, Thomas J,**  
377 **Kamoun S, Bayles R, Uauy C, Saunders DG.** 2015. Field pathogenomics reveals the  
378 emergence of a diverse wheat yellow rust population. *Genome Biol* **16**:23
- 379 **Hogenhout SA, Van der Hoorn RA, Terauchi R, Kamoun S.** 2009. Emerging concepts in  
380 effector biology of plant-associated organisms. *Mol Plant Microbe Interact* **22**:115-22
- 381 **Maldonado-Bonilla LD, Eschen-Lippold L, Gago-Zachert S, Tabassum N, Bauer N,**  
382 **Scheel D, Lee J.** 2014. The Arabidopsis tandem zinc finger 9 protein binds RNA and  
383 mediates pathogen-associated molecular pattern-triggered immune responses. *Plant Cell*  
384 *Physiol* **55**:412-25
- 385 **Nemri A, Saunders DG, Anderson C, Upadhyaya NM, Win J, Lawrence GJ, Jones DA,**  
386 **Kamoun S, Ellis JG, Dodds PN.** 2014. The genome sequence and effector complement of  
387 the flax rust pathogen *Melampsora lini*. *Front Plant Sci* **5**:98.
- 388 **Pais M, Win J, Yoshida K, Etherington GJ, Cano LM, Raffaele S, Banfield MJ, Jones A,**  
389 **Kamoun S, Saunders DG.** 2013. From pathogen genomes to host plant processes: the  
390 power of plant parasitic oomycetes. *Genome Biol* **14**:211
- 391 **Pérez-Vilaró G, Fernández-Carrillo C, Mensa L, Miquel R, Sanjuan X, Fornis X, Pérez-del-**  
392 **Pulgar S, Díez J.** 2015. Hepatitis C virus infection inhibits P-body granule formation in human  
393 livers. *J Hepatol* **62**:785-90
- 394 **Petre B, Saunders DG, Sklenar J, Lorrain C, Win J, Duplessis S, Kamoun S.** 2015a.  
395 Candidate Effector Proteins of the Rust Pathogen *Melampsora larici-populina* Target Diverse  
396 Plant Cell Compartments. *Mol Plant Microbe Interact* **28**:689-700
- 397 **Petre B, Lorrain C, Saunders DG, Win J, Sklenar J, Duplessis S, Kamoun S.** 2015b. Rust  
398 fungal effectors mimic host transit peptides to translocate into chloroplasts. *Cell Microbiol* doi:  
399 10.1111/cmi.12530
- 400 **Petre B, Joly DL, Duplessis S.** 2014. Effector proteins of rust fungi. *Front Plant Sci* **5**:416
- 401 **Petre B, Kamoun S.** 2014. How do filamentous pathogens deliver effector proteins into plant  
402 cells? *PLoS Biol* **12**:e1001801
- 403 **Qiao Y, Shi J, Zhai Y, Hou Y, Ma W.** 2015. *Phytophthora* effector targets a novel component  
404 of small RNA pathway in plants to promote infection. *Proc Natl Acad Sci U S A* **112**:5850-5
- 405 **Reineke LC, Lloyd RE.** 2013. Diversion of stress granules and P-bodies during viral  
406 infection. *Virology* **436**:255-67
- 407 **Roux ME, Rasmussen MW, Palma K, Lolle S, Regué AM, Bethke G, Glazebrook J,**  
408 **Zhang W, Sieburth L, Larsen MR, Mundy J, Petersen M.** 2015. The mRNA decay factor  
409 PAT1 functions in a pathway including MAP kinase 4 and immune receptor SUMM2. *EMBO J*  
410 **34**:593-608
- 411 **Sarris PF, Jones JD.** 2015. Plant immune receptors mimic pathogen virulence targets.  
412 *Oncotarget* **6**:16824-5
- 413 **Spanu PD.** 2015. RNA-protein interactions in plant disease: hackers at the dinner table. *New*  
414 *Phytol* **207**:991-5
- 415 **Steffens A, Bräutigam A, Jakoby M, Hülskamp M.** 2015. The BEACH Domain Protein  
416 SPIRRIG Is Essential for Arabidopsis Salt Stress Tolerance and Functions as a Regulator of  
417 Transcript Stabilization and Localization. *PLoS Biol* **13**:e1002188

- 418 **Upadhyaya NM, Mago R, Staskawicz BJ, Ayliffe MA, Ellis JG, Dodds PN.** 2014. A  
419 Bacterial Type III Secretion Assay for Delivery of Fungal Effector Proteins into Wheat. *Mol*  
420 *Plant Microbe Interact* **27**:255-264
- 421 **Weiberg A, Wang M, Bellinger M, Jin H.** 2014. Small RNAs: a new paradigm in plant-  
422 microbe interactions. *Annu Rev Phytopathol* **52**:495-516
- 423 **Win J, Chaparro-Garcia A, Belhaj K, Saunders DG, Yoshida K, Dong S, Schornack S,**  
424 **Zipfel C, Robatzek S, Hogenhout SA, Kamoun S.** 2012. Effector biology of plant-associated  
425 organisms: concepts and perspectives. *Cold Spring Harb Symp Quant Biol* **77**:235-47
- 426 **Wu CH, Krasileva KV, Banfield MJ, Terauchi R, Kamoun S.** 2015. The "sensor domains"  
427 of plant NLR proteins: more than decoys? *Front Plant Sci* **6**:134
- 428 **Xu J, Chua NH.** 2009. *Arabidopsis* decapping 5 is required for mRNA decapping, P-body  
429 formation, and translational repression during postembryonic development. *Plant Cell*  
430 **21**:3270-9
- 431 **Xu J, Yang JY, Niu QW, Chua NH.** 2006. *Arabidopsis* DCP2, DCP1, and VARICOSE form a  
432 decapping complex required for postembryonic development. *Plant Cell* **18**:3386-98
- 433 **Zheng W, Huang L, Huang J, Wang X, Chen X, Zhao J, Guo J, Zhuang H, Qiu C, Liu J,**  
434 **Liu H, Huang X, Pei G, Zhan G, Tang C, Cheng Y, Liu M, Zhang J, Zhao Z, Zhang S, Han**  
435 **Q, Han D, Zhang H, Zhao J, Gao X, Wang J, Ni P, Dong W, Yang L, Yang H, Xu JR,**  
436 **Zhang G, Kang Z.** 2013. High genome heterozygosity and endemic genetic recombination in  
437 the wheat stripe rust fungus. *Nat Commun* **4**:2673

#### 438 LEGENDS

#### 439 TABLE 1. *Puccinia striiformis* f. sp. *tritici* candidate effectors analysed in this study

440 <sup>a</sup> Protein IDs were adapted from [Cantu et al., 2013](#) by removing the isolate ID for simplicity.

441 Full-length protein IDs are indicated in [Table S1](#).

442 <sup>b</sup> Data mined from [Cantu et al., 2013](#).

443 <sup>c</sup> Number of amino acids are indicated; SP: predicted signal peptide

444 <sup>d</sup> Number of cysteine residues in the mature form of the protein (i.e. without the signal  
445 peptide)

446 <sup>e</sup> H: transcripts were identified in isolated haustoria; H5: transcripts were in the top 5% of  
447 transcripts detected in isolated haustoria; H1: transcripts were in the top 1% transcripts  
448 detected in isolated haustoria; I: transcripts were identified in wheat tissues during infection;  
449 I10: transcripts were in the top 10% transcripts detected in wheat tissues during infection; TC:  
450 transcript accumulation was detected by RTq-PCR during a time-course infection of wheat.

451 <sup>f</sup> Pgt: *Puccinia graminis* f sp *tritici*; Mlp: *Melampsora larici-populina*; Hv: *Hemileia vastatrix*.

#### 452 FIGURE 1. Seven candidate effectors show specific accumulation patterns in leaf cells

453 Live-cell imaging of the 16 candidate effector-GFP fusion proteins accumulating in distinct  
454 subcellular compartments of *N. benthamiana* leaf cells. Proteins were transiently expressed in  
455 *N. benthamiana* leaf cells by agroinfiltration. Live-cell imaging was performed with a laser-  
456 scanning confocal microscope two days after infiltration. GFP and chlorophyll were excited at  
457 488 nm. GFP (green) and chlorophyll (blue) fluorescence were collected at 505-525 nm and  
458 680-700 nm, respectively. Images are single optical sections of 0.8 µm or a maximal  
459 projection of up to 47 optical sections (max. z-stack of 37.6 µm). Images displayed are  
460 overlays of the GFP signal, the chlorophyll signal, and bright field. For A-G, specific cellular  
461 compartments in which the GFP signal accumulates are indicated. White arrowheads indicate  
462 GFP-labelled cytosolic bodies (A), chloroplasts (B-C), nuclei (D-F), nuclear surrounding (G),  
463 or cytosolic fractions (H-P). Black arrowheads indicate GFP-labelled small cytosolic bodies  
464 (A), a stromule (B), a nucleus (C), the plasma membrane (G), or nuclei (H-P). In (P), the low  
465 level of accumulation of the fusion protein imposed higher laser power and gain, which  
466 resulted in non-specific signal for the GFP channel being visible in chloroplasts and ostiole  
467 edges.

#### 468 FIGURE 2. PST15391 and PST18447 carry functional nuclear-localisation signals

469 (A) Schematic representation of the protein primary structure of PST15391 and PST18447.  
470 Yellow: predicted signal peptide for secretion; red: amino acid sequence necessary for  
471 nuclear accumulation; blue: positively charged residues (net charge is indicated in  
472 parentheses). Numbers indicate amino acid positions.

473 (B) Live-cell imaging of GFP-PST15391, GFP-PST15391Δ9CT, GFP-PST18447, and GFP-  
474 PST18447Δ8NT in *N. benthamiana* leaf cells. The cellular compartments in which the GFP



478 signal accumulates are indicated. Proteins were transiently expressed in *N. benthamiana* leaf  
479 cells by agroinfiltration. Live-cell imaging was performed with a laser-scanning confocal  
480 microscope two days after infiltration. GFP and chlorophyll were excited at 488 nm. GFP  
481 (green) and chlorophyll (blue) fluorescence were collected at 505-525 nm and 680-700 nm,  
482 respectively. Images are single optical sections of 0.8  $\mu\text{m}$  or maximal projections of up to 3  
483 optical sections (max. z-stack of 2.4  $\mu\text{m}$ ). White arrowheads: nuclei; black arrowheads:  
484 cytosol.

485  
486 **FIGURE 3. Candidate effectors associate with distinct plant protein complexes**

487 (A) Number of *N. benthamiana* proteins associating with each candidate effector. Candidate  
488 effectors are arranged from left to right in descending order according to the number of  
489 interactors.

490 (B) Number of candidate effectors associating with each *N. benthamiana* protein. The 439  
491 interactors are arranged from left to right in descending order according to the number of  
492 associated candidate effectors. The X-axis legend indicates (from right to left) the number of  
493 *N. benthamiana* proteins that associated with at least one (439), two (328), three (204), five  
494 (99), and ten (31) candidate effectors.

495 (C) For each *N. benthamiana* protein identified, we calculated a score following the formula  
496 "protein score = maximal peptide count/(redundancy)<sup>2n</sup>". The redundancy value was calculated  
497 by integrating the coIP/MS data from [Petre et al., 2015a](#). Proteins are arranged from left to  
498 right in descending order based on their score. Selected proteins are indicated on the graph.

499 Proteins were transiently expressed in *N. benthamiana* leaf cells by agroinfiltration. Total  
500 proteins were isolated two days after infiltration. Plant protein complexes associated with the  
501 candidate effector-GFP fusions were purified by anti-GFP coimmunoprecipitation, separated  
502 with SDS-PAGE, and digested with trypsin. Trypsin-digested peptides were processed by LC-  
503 MS/MS and collected peaks were used to search a database containing the predicted  
504 proteome of *N. benthamiana*. After filtering out contaminants and proteins supported by a  
505 single peptide, and clustering similar proteins, a total of 439 non-redundant protein interactors  
506 were retained. The full dataset used to draw these figures is shown in [Table S2](#).

507  
508 **FIGURE 4. Nine candidate effectors have a specific subcellular localisation and/or a**  
509 **high-scoring plant protein interactor**

510 The 16 candidate effectors used in this study are shown in the middle column. Colours  
511 indicate specific subcellular localisation. The 16 plant proteins with the lowest scores ( $\leq 0.01$ ;  
512 termed 'usual suspects') and the 18 plant proteins with the highest scores ( $\geq 3$ ; termed  
513 'specific interactors') are shown on the left- and right-hand sides, respectively. Black lines  
514 indicate the association between a candidate effector and a plant protein as detected by  
515 coIP/MS. For each *N. benthamiana* protein, the most similar wheat protein was identified by  
516 protein sequence similarity searches against the predicted proteome of the bread wheat  
517 *Triticum aestivum* L. using the BLASTp algorithm.

518  
519 **FIGURE 5. TaEDC4 accumulates in P-bodies**

520 (A) Amino acid alignment of EDC4 of *Arabidopsis thaliana* (AtEDC4, AT3G13300.2),  
521 *Nicotiana benthamiana* (NbEDC4, NbS00023257g0003.1), and *Triticum aestivum* (TaEDC4,  
522 Traes\_6DL\_3FBA5B70E.1). Alignment was performed with ClustalX. Amino acid residues are  
523 colored according to the ClustalX scheme.

524 (B) Schematic representation of the protein primary structure of AtEDC4, NbEDC4, and  
525 TaEDC4. Numbers indicate amino acid positions. The percentage of pairwise amino acid  
526 sequence identity is indicated to the right of the diagram.

527 (C) Live-cell imaging of TaEDC4-mCherry and YFP-VCSsc in *N. benthamiana* leaf cells.  
528 Images show a single optical section of 0.8  $\mu\text{m}$ . Proteins were transiently expressed in *N.*  
529 *benthamiana* leaf cells by agroinfiltration. Live-cell imaging was performed with a laser-  
530 scanning confocal microscope with a sequential scanning mode two days after infiltration. The  
531 YFP was excited at 514 nm; mCherry and chlorophyll were excited at 561 nm. YFP (yellow),  
532 mCherry (red), and chlorophyll (blue) fluorescence were collected at 525-550 nm, 580-620  
533 nm, and 680-700 nm, respectively. White arrowhead: nuclei; black arrowhead: P-bodies. The  
534 intensity plot in the top right corner shows YFP and mCherry (RFP) relative fluorescence  
535 signal intensity along the white line connecting points a and b in the overlay image.

536  
537 **FIGURE 6. PST02549 associates with TaEDC4 in planta**

538 Anti-green fluorescent protein (GFP) coimmunoprecipitation followed by immunoblot and  
539 sodium dodecyl sulphate-polyacrylamide gel electrophoresis/Coomassie Brilliant Blue (SDS-  
540 PAGE/CBB) analyses. Proteins were transiently expressed in *N. benthamiana* leaf cells by  
541 agroinfiltration. Total proteins were isolated two days after infiltration, and immediately used  
542 for anti-GFP immunoprecipitation. Immunoprecipitated protein mixtures were separated with  
543 SDS-PAGE. For direct protein visualization, the acrylamide gel was stained with CBB. For  
544 immunoblotting, proteins were electrotransferred onto polyvinylidene fluoride (PVDF)  
545 membranes. Immunodetection was performed with anti-GFP or anti-red fluorescent protein  
546 (RFP) antibodies, and immunoblots were revealed with a chemiluminescent imager.  
547 Ponceau S staining of the PVDF membrane was used as a loading and transfer control.  
548 Theoretical protein size is indicated in parentheses in kilodalton (kDa) for each fusion protein.  
549 Numbers to the left of the blot and gel images indicate protein size in kDa. In the immunoblot  
550 images, red asterisks indicate specific protein bands. In the gel image, asterisks indicate  
551 specific protein bands (red: TaEDC4-mCherry; black: GFP fusions); the PageRuler ladder is  
552 shown to the left of the image. IP: immunoprecipitation. In the IP-GFP/  $\alpha$ -RFP blot, note that  
553 the weak band signals observed on the right side between 25 and 40 kDa are due to non-  
554 specific background detection of abundant GFP fusions by the anti-RFP antibodies.  
555

#### 556 **FIGURE 7. PST02549 and TaEDC4 co-accumulate in large P-bodies**

557 (A) Live-cell imaging of PST02549-GFP and TaEDC4-mCherry in *N. benthamiana* leaf cells.  
558 Images show a single optical section of 0.8  $\mu$ m. The white asterisk indicates a pavement cell  
559 expressing only the TaEDC4-mCherry fusion, in which no large P-body was detected.  
560 (B) Categorical scatterplots showing the diameter of P-bodies labelled by PST02549-GFP  
561 and/or TaEDC4-mCherry in leaf cells. Boxes depict the interquartile range and the median,  
562 vertical bars indicate the first and fourth quartile range, and outlier data points are depicted  
563 in black. P-body diameters were measured from laser scanning confocal microscope images  
564 acquired through two to eight independent agroinfiltration assays. The different colours  
565 correspond to independent observations (repeats). The following numbers of P-bodies were  
566 scored: PST02549-GFP (n=150); TaEDC4-mCherry (n=20), PST02549-GFP/TaEDC4-  
567 mCherry (n=303), PST02549-GFP/TaEDC4 (n=96). For treatments 'PST02549-GFP' and  
568 'TaEDC4-mCherry', the fusion proteins were expressed alone or with additional control fusion  
569 proteins (see [Table S4](#) for raw data).  
570 (C) Live-cell imaging of various GFP and mCherry fusion proteins in *N. benthamiana* leaf  
571 cells. Images present a single optical section of 0.8  $\mu$ m of a maximal projection of up to 6  
572 optical sections (max. z-stack of 4.8  $\mu$ m). Overlay images merge GFP, mCherry, chlorophyll,  
573 and bright field signals. Note that for the PST02549-GFP/TaEDC4, TaEDC4 was untagged  
574 and the mCherry fluorescence signal was not recorded.  
575 For (A) and (C), proteins were transiently expressed in *N. benthamiana* leaf cells by  
576 agroinfiltration. Live-cell imaging was performed with a laser-scanning confocal microscope  
577 with a sequential scanning mode two days after infiltration. GFP and the chlorophyll were  
578 excited at 488 nm; the mCherry was excited at 561 nm. GFP (green), mCherry (red), and  
579 chlorophyll (blue) fluorescence were collected at 505-525 nm, 580-620 nm and 680-700 nm,  
580 respectively. Black arrowheads indicate P-bodies. White arrowheads: nuclei. Note that the  
581 large protein aggregates formed by MLP124111-GFP do not show any TaEDC4-mCherry  
582 signal.  
583

#### 584 **FIGURE S1. Immunoblots confirm the accumulation of the fusion proteins in** 585 ***N. benthamiana* leaf cells**

586 Proteins were transiently expressed in *N. benthamiana* leaf cells by agroinfiltration. Total  
587 proteins were extracted two days after infiltration by grinding leaves in liquid nitrogen and  
588 immediately extracting, reducing and denaturing proteins from the leaf powder. Proteins were  
589 separated on 15% SDS-PAGE gels and transferred onto a nitrocellulose membrane. Primary  
590 and secondary immune detection were performed with rabbit anti-GFP and goat anti-rabbit  
591 antibodies, respectively. Images originating from the same membrane and processed at the  
592 same time are grouped together. Blots were cropped to remove lanes previously published  
593 elsewhere ([Petre et al., 2015a](#)). Secondary antibodies and PageRuler signals were detected  
594 simultaneously using an infrared imager. The theoretical size of each fusion protein is  
595 indicated in kDa in parentheses. White asterisks indicate specific protein bands.  
596

#### 597 **FIGURE S2. PST11721-GFP labels nuclei foci**

598 Live-cell imaging of PST11721-GFP in *N. benthamiana* leaf cells. Proteins were transiently  
599 expressed in *N. benthamiana* leaf cells by agroinfiltration. Live-cell imaging was performed  
600 with a laser-scanning confocal microscope two days after infiltration. The GFP was excited at  
601 488 nm. GFP (green) fluorescence was collected at 505-550 nm. The image is a single  
602 optical section of 0.8  $\mu\text{m}$ , showing an overlay of the GFP and bright field channels. The black  
603 arrowheads indicate GFP-labelled nuclear foci.  
604

604

605 **FIGURE S3. *In planta* coimmunoprecipitation efficiently purifies fusion proteins**

606 Protein mixtures isolated by anti-GFP immunoprecipitation were reduced and denatured in a  
607 Laemmli buffer. Proteins were separated with SDS-PAGE and stained with Coomassie  
608 Brilliant Blue. Trypsin-digested peptides were processed by LC-MS/MS and collected peaks  
609 were used to search a database containing the GFP sequence. The theoretical size of each  
610 fusion protein is indicated in parentheses in kilodalton (kDa). The number of peptides  
611 identified by LC-MS/MS and matching the GFP is indicated for each fusion protein between  
612 brackets. The size of the PageRuler ladder bands is indicated in kDa. Images originating from  
613 the same gel are grouped together. Black asterisks indicate detectable and specific protein  
614 bands.  
615

615

616 **TEXT S1. R script to generate categorical scatterplots**

617 **TABLE S1. Cloning and protein details**

618 **TABLE S2. The *P. striiformis* f sp *tritici* candidate effector interactome**

619 **TABLE S3. Overlap between CoIP/MS replicates**

620 **TABLE S4. P-body diameter values**

621 **TABLE S5. Detection of TaEDC4 in *N. benthamiana* leaves by coIP/MS**

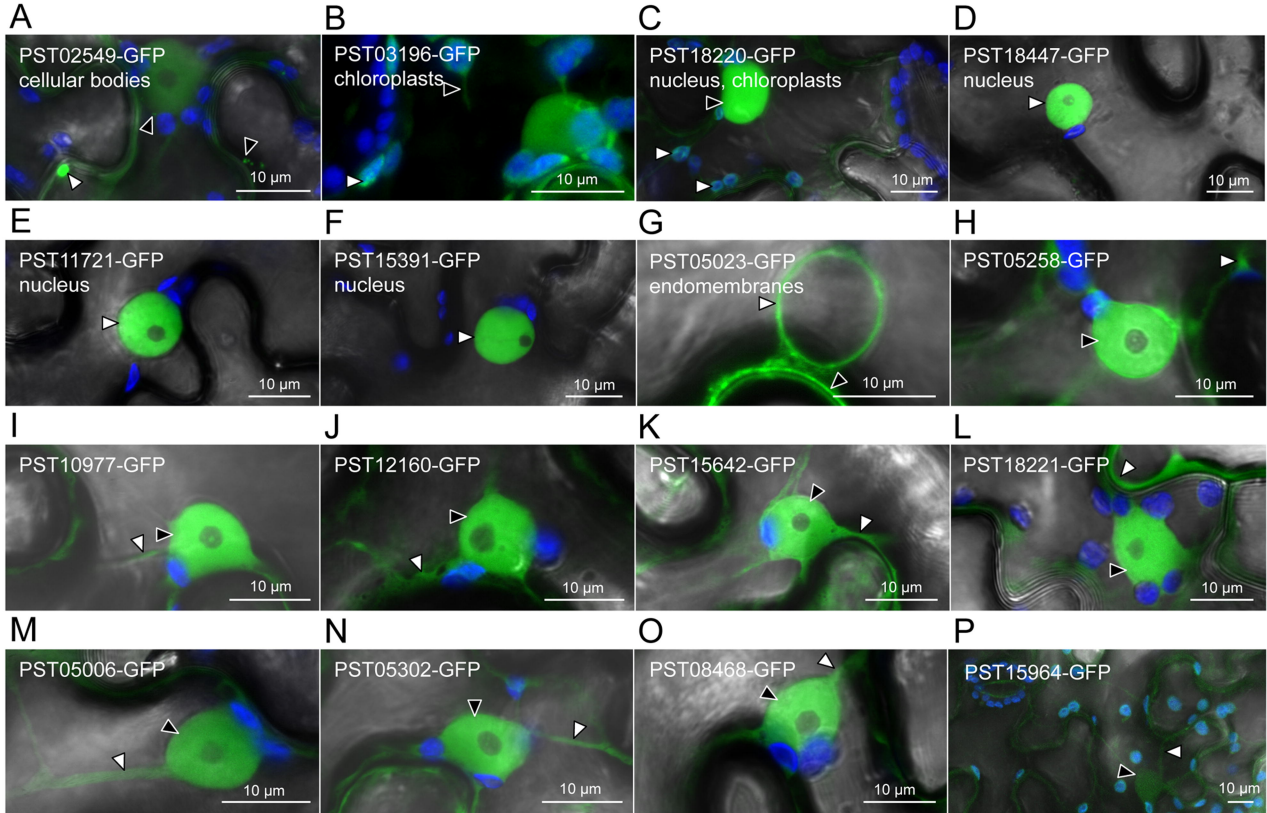

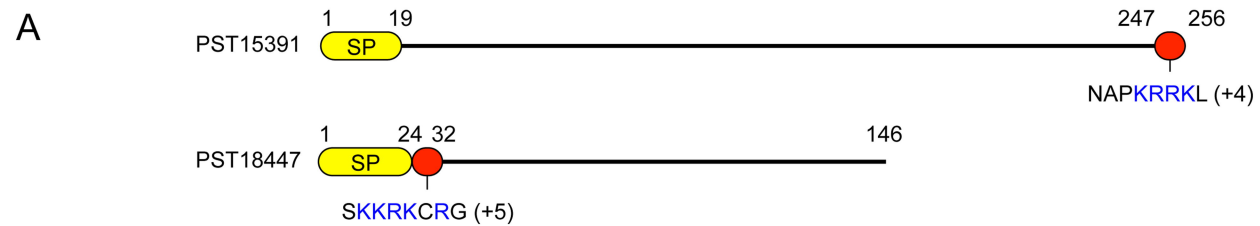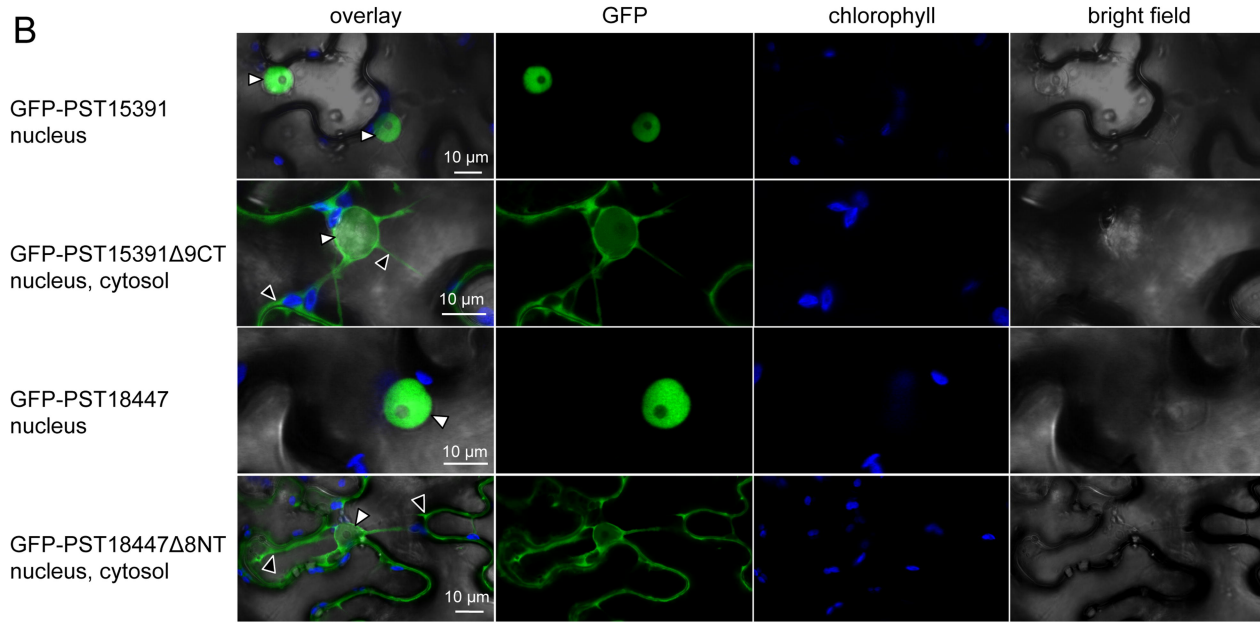

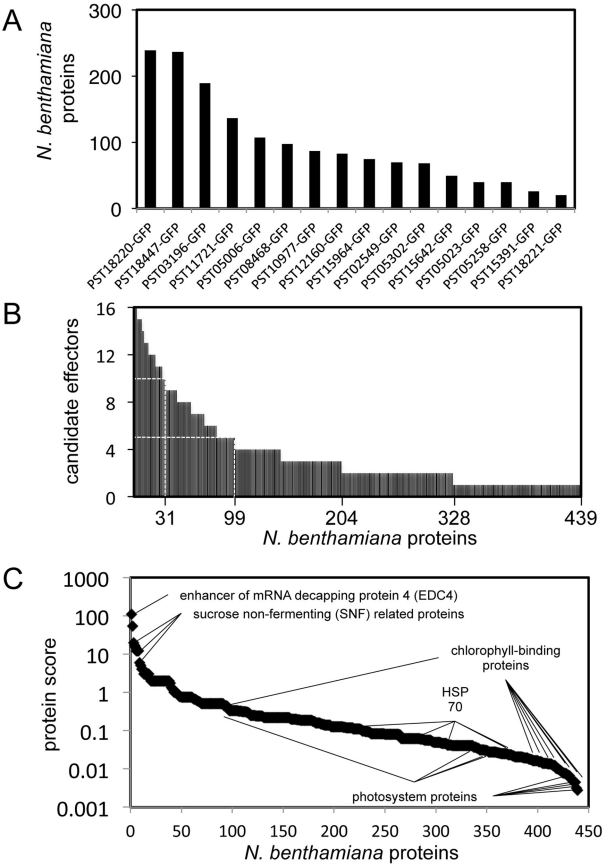

'usual suspects'  
(score < 0.01)

candidate  
effectors

specific interactors  
(score ≥ 3)

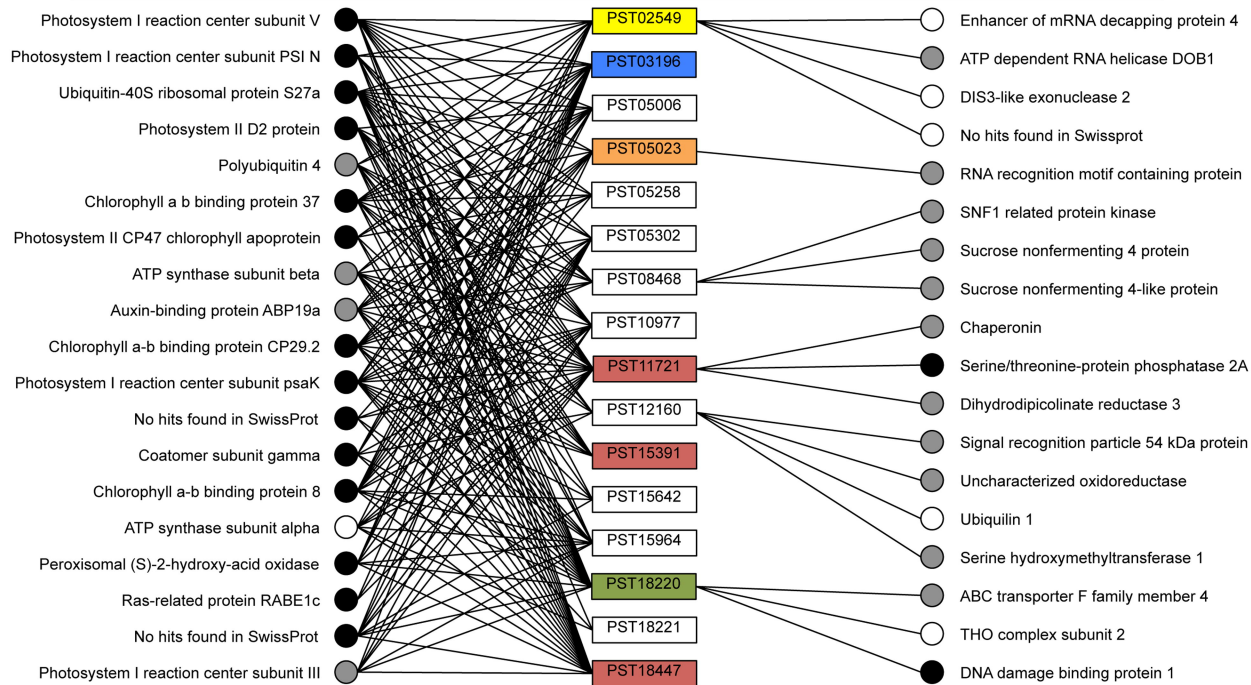

AA identity to wheat  
most similar protein:

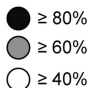

candidate effector  
subcellular localisation:

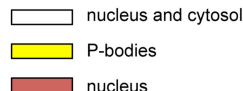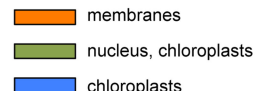





|                               |   |   |   |   |  |  |   |   |   |
|-------------------------------|---|---|---|---|--|--|---|---|---|
| PST02549-GFP                  | + | + | + | + |  |  |   |   | + |
| PST10977-GFP                  |   |   |   |   |  |  |   | + |   |
| PST03196-GFP                  |   |   |   |   |  |  |   |   | + |
| MLP124111-GFP                 |   |   |   |   |  |  |   |   | + |
| TaEDC4-mCherry                | + |   |   |   |  |  | + | + | + |
| MLP124202 $\Delta$ CT-mCherry |   | + |   |   |  |  |   |   |   |
| MLP123218-mCherry             |   |   | + |   |  |  |   |   |   |
| MLP123438-mCherry             |   |   |   | + |  |  |   |   |   |

**INPUT**

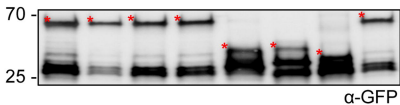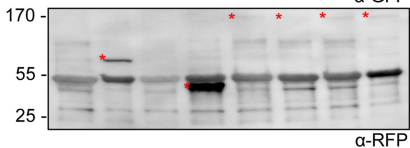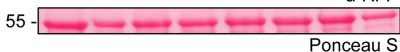

**IP-GFP**

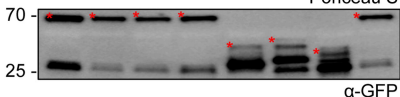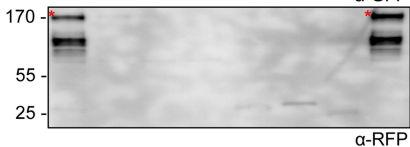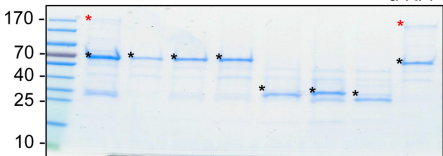

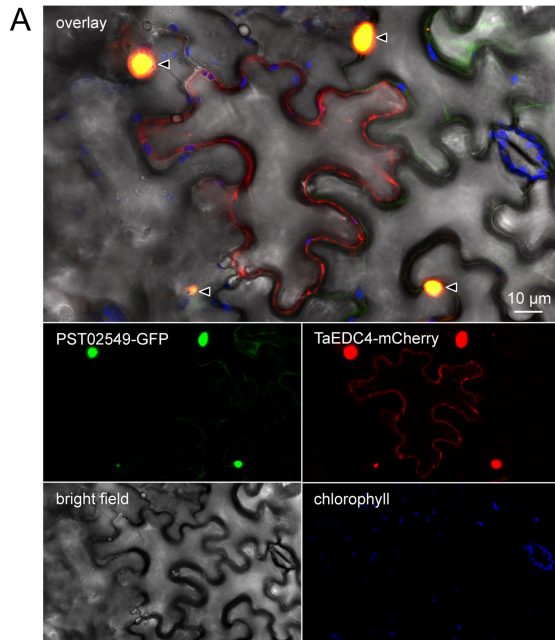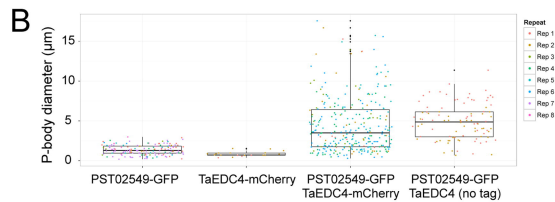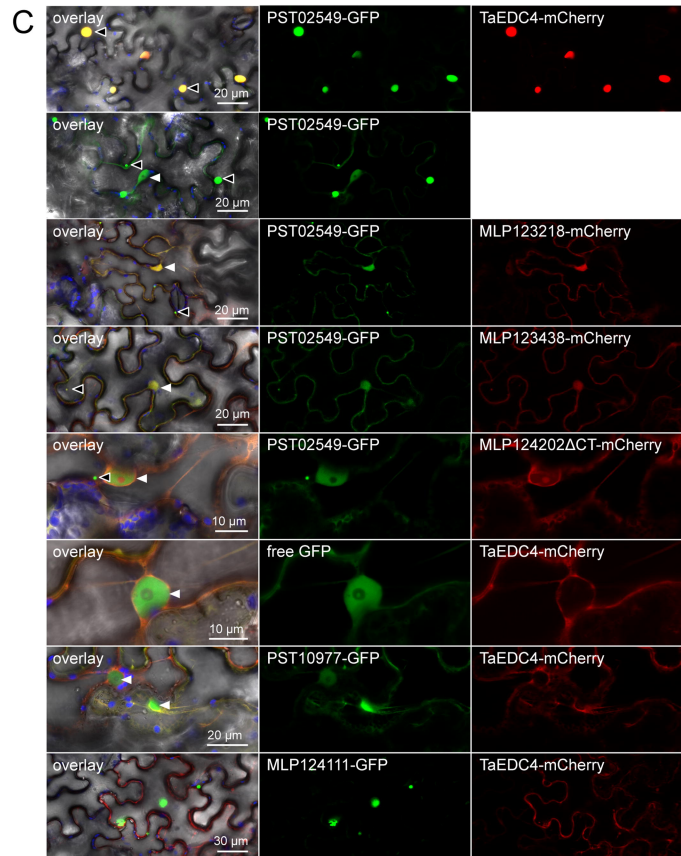

PST18221-GFP (37)

PST18220-GFP (38)

PST10977-GFP (42)

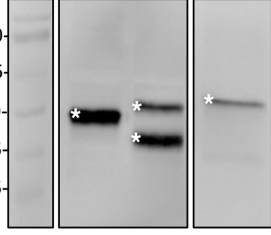

PST15642-GFP (36)

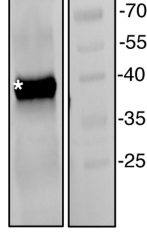

PST15964-GFP (40)

PST05302-GFP (43)

PST05258-GFP (54)

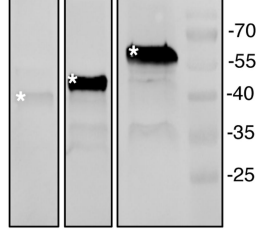

PST02549-GFP (59)

PST18447-GFP (41)

PST05006-GFP (47)

PST15391-GFP (54)

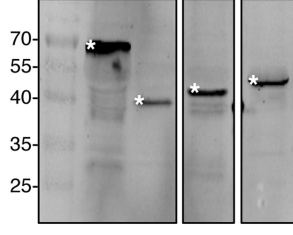

PST03196-GFP (46)

PST11721-GFP (53)

PST08468-GFP (48)

PST12160-GFP (43)

70  
55  
40  
35  
25

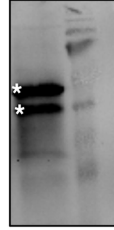

PST05023-GFP (55)

70  
55  
40  
35  
25

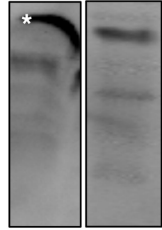

GFP-PST15391 (54)

GFP-PST18220 (37)

70  
55  
40  
35  
25

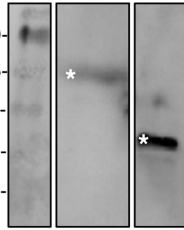

GFP-PST15391Δ9CT (53)

70  
55  
40  
35  
25

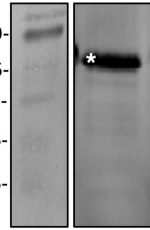

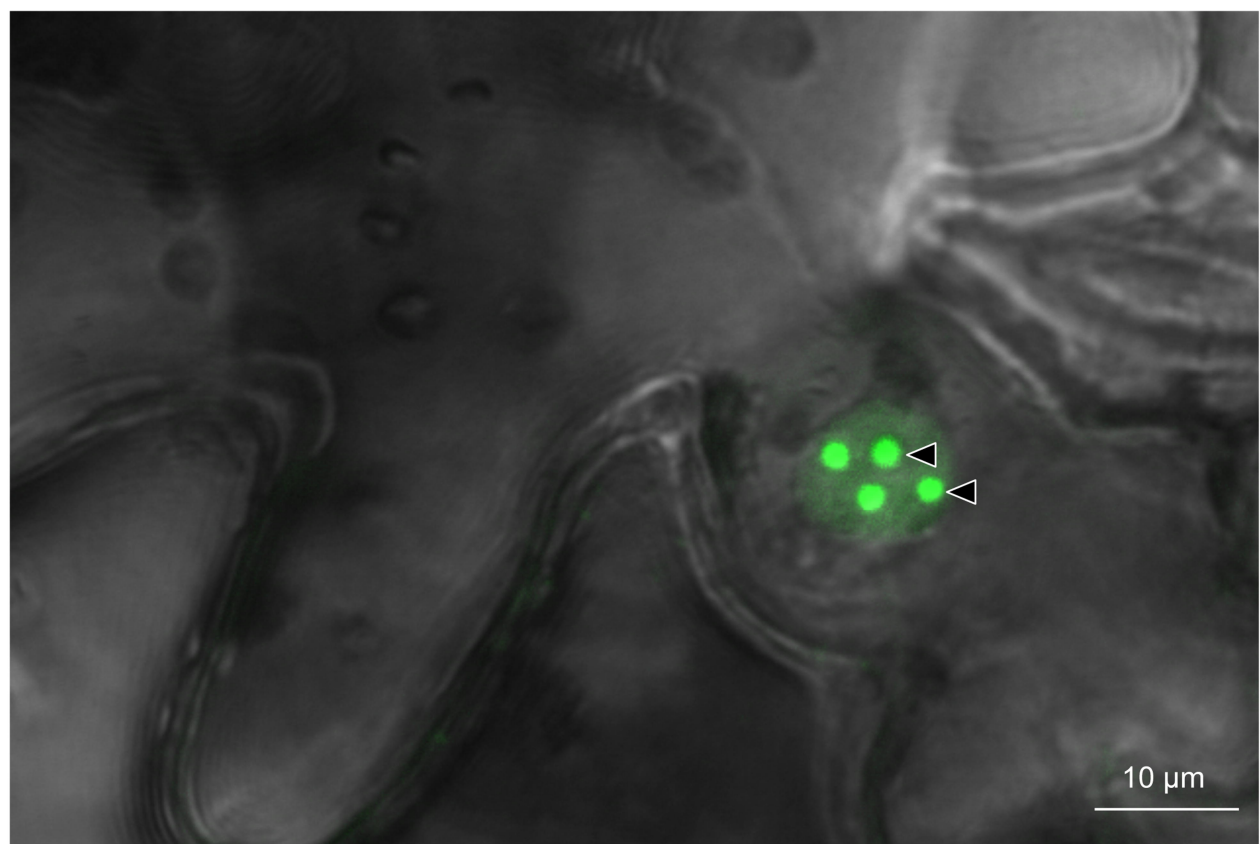

PST02549-GFP (59) [40]

PST12160-GFP (43) [26]

PST08468-GFP (48) [72]

PST15391-GFP (54) [47]

PST15642-GFP (36) [51]

PST18220-GFP (38) [53]

PST18221-GFP (37) [48]

PST05258-GFP (54) [45]

PST05006-GFP (47) [34]

PST05023-GFP (55) [39]

PST02549-GFP (59) [44]

PST05302-GFP (43) [52]

PST15964-GFP (40) [42]

PST18447-GFP (41) [35]

PST10977-GFP (42) [48]

PST03196-GFP (46) [53]

PST08468-GFP (48) [46]

PST11721-GFP (53) [53]

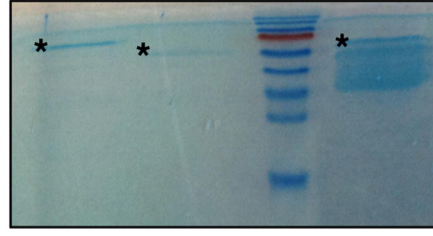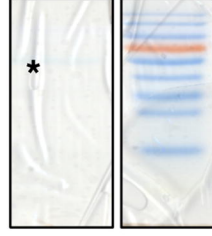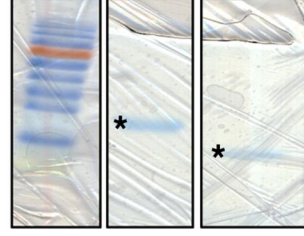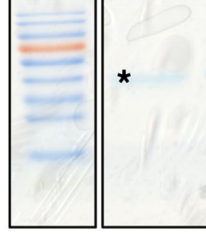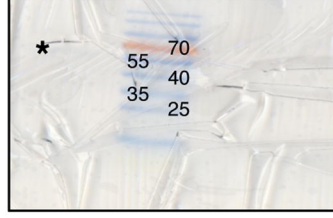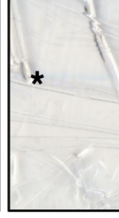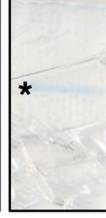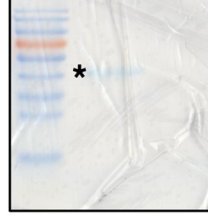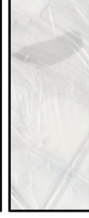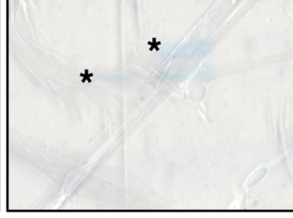

Source: http://biorxiv.org/content/10.1101/032276v1.full.pdf
